# Supplementary material
Source: publisher figshare collection journal article supplement (https://gsajournals.figshare.com/ndownloader/files/24310964)
Supplement: Supplementary file 1 [file 24310964]

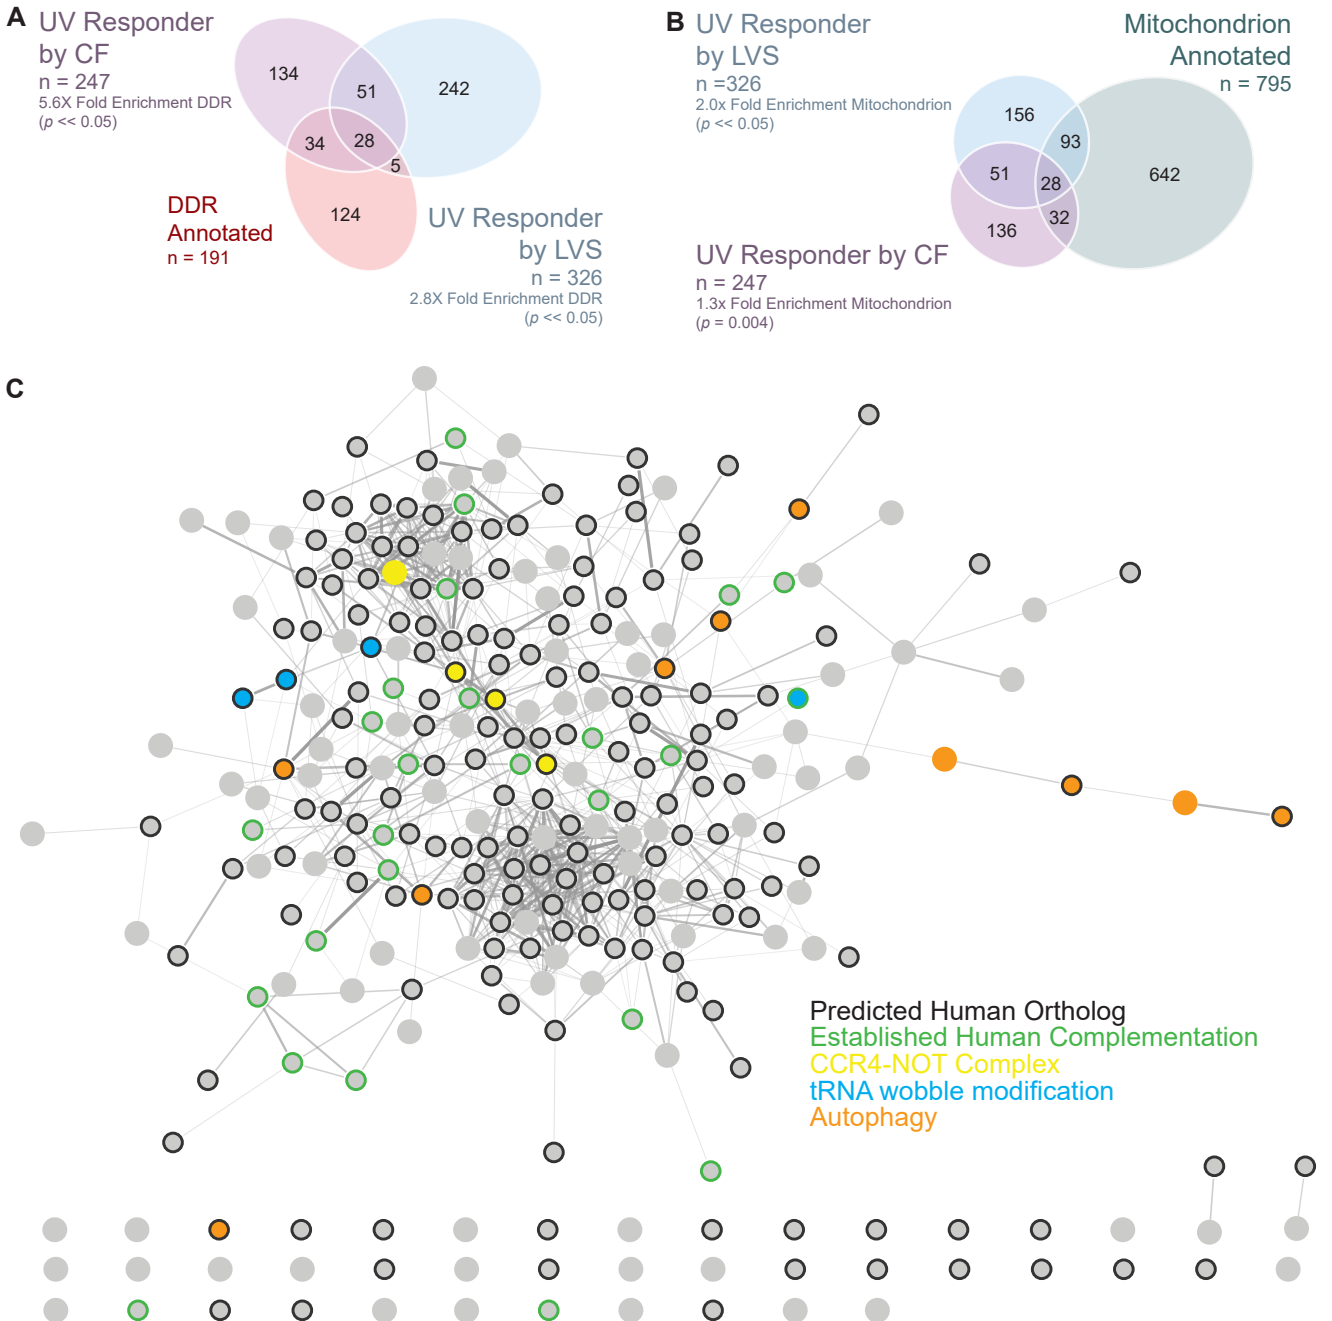

**Figure S3: DDR and Mitochondrial strains of interest.** A, B) 3-way, area-proportional Venn diagrams demonstrating overlap between CF and LVS-nominated gene sets with the DDR and mitochondrion-annotated gene sets, respectively. C) LVS-specific subnetwork of YeastNet V3 with edge weight thresholded to  $\geq 1.5$ . Black node border denotes predicted human ortholog, green node border denotes established human complementation, yellow nodes denote CCR4-NOT complex components, blue nodes denote tRNA wobble modification components, and orange nodes denote autophagy components.
